# Supplementary material for: Individualized PEEP without Recruitment Maneuvers Improves Intraoperative Oxygenation: A Randomized Controlled Study
Source: MDPI journal article supplement (doi:10.3390/bioengineering10101172), 2023-10-09
Supplement: s1 [file s1]

**Supplementary Figure S1 Experimental protocol and interventions.**

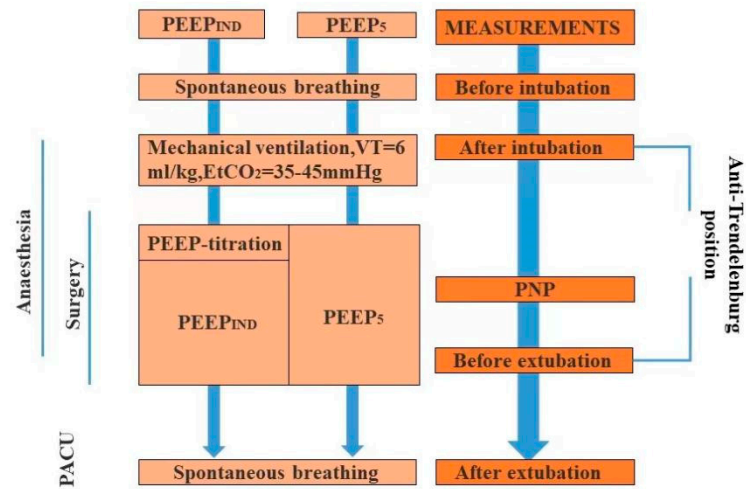

PACU, post-anaesthesia care unit; PEEP<sub>IND</sub>, individualized PEEP setting guided by electrical impedance tomography; PEEP<sub>5</sub>, standard PEEP setting of 5 cmH<sub>2</sub>O; PNP, pneumoperitoneum.
